# Supplementary material
Source: PubMed Central journal article supplement (PMC4767591)

## Supplementary Figures (1-6)

### **RNF121 inhibits angiogenic growth factor signaling by restricting cell surface expression of VEGFR-2**

Armin Maghsoudlou<sup>1\*</sup>, Rosana D. Meyer<sup>1\*</sup>, Emad Arafa<sup>1</sup>, Kobra Rezaadeh<sup>1</sup>, Jeffrey Pudney<sup>2</sup>, Edward Hartsough<sup>1</sup>, Nader Rahimi<sup>1†</sup>

<sup>1</sup>Department of Pathology and Laboratory Medicine, <sup>2</sup>Department of Obstetrics & Gynecology, Boston University Medical Campus, Boston, MA 02118

\*These authors contributed equally to this work.

**†Corresponding author:**

Nader Rahimi  
Departments of Pathology  
Boston University Medical Campus  
670 Albany St., Room 510, Boston, MA 02118  
Tel: 617-638-5011  
Fax: 617-414-7914  
E-mail: [nrahimi@bu.edu](mailto:nrahimi@bu.edu).

The authors declare no conflict of interest.

**Running title:** RNF121 regulates cell surface expression of VEGFR-2

**S. Figure 1: The predicted 3D structure of RING domain and the RING domain consensus sequence motif:** (A) The predicted 3D structure of RING domain of RNF121, which was modeled based on the known RING domain of RNF7/RBX2 (RING BOX Protein2). (B) The RING domain consensus sequence motif and the corresponding putative RING domain of RNF121 is shown.

**S. Figure 2: Effect of cycloheximide on RNF-121 mediated maturation of VEGFR-2:** (A) HEK-293 cells expressing VEGFR-2 were subjected to cycloheximide (CHX) chase by incubating cells for 30 and 90 minutes. Cells were lysed and whole cell lysates were blotted for VEGFR-2 or loading control. (B) HEK-293 cells expressing VEGFR-2 alone or with RNF121 were treated with cycloheximide for 90 minutes and cell lysates were blotted for VEGFR-2, RNF121 and loading control, PLC $\gamma$ 1.

**S. Figure 3: RNF121 co-localizes with KDEL-GFP:** Immunofluorescence staining of HEK-293 cells expressing VEGFR-2 with c-Myc-RNF121 and KDEL-GFP. The overlay of the same images is also shown. Scale bars, 10  $\mu$ m.

**S. Figure 4: RNF121 inhibits VEGF-induced tyrosine phosphorylation of VEGFR-2:** PAE cells co-expressing VEGFR-2 with empty vector (pMSCV) or RNF121 were stimulated with VEGF (100ng/ml) for 10 minutes and cells were lysed. Whole cell lysates were blotted with phosphoY1054-VEGFR-2, total VEGFR-2, phospho-p38MAPK, total p38MAPK, phospho-PLC $\gamma$ 1 and total PLC $\gamma$ 1. Graph is representative of two independent experiments.

**S. Figure 5. Validation of RNF121 antibody:** Whole cell lysates from HEK-293 cells expressing empty vector or Myc-RNF121 was blotted with anti-c-Myc, anti-RNF121 or loading control protein. The same cell lysates also was blotted with RNF-121 antibody pre-incubated with blocking RNF121 peptide.

**S. Figure 6: RNF121 expression is regulated by ER stress and oxidative stress inducing agents:** PAE cells treated with ER-stress inducing agent (tunicamycin) or hydrogen peroxide and cells were lysed and whole cell lysates blotted for RNF121 or loading control.

# S. Figure 1

A

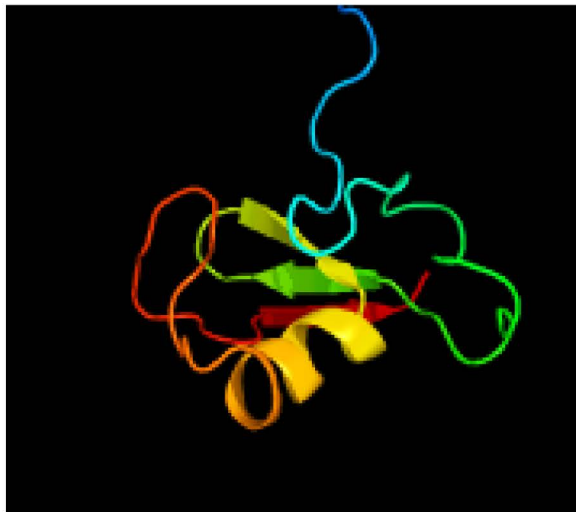

B

RING finger domain consensus sequence:  $C-X_2-C-X_{[9-39]}-C-X_{[1-3]}-H-X_{[2-3]}-C-X_2-C-X_{[4-48]}-C-X_2-C$

Human RNF121 ...IGFYSESGMPTKHLSDSVCAVCGQQIFVDVSEEGI IENTYRLSCNHFVHEFCIRGW CIVGKKQTCPYCKEKVDLKRMFSPW...

# S. Figure 2

**A**

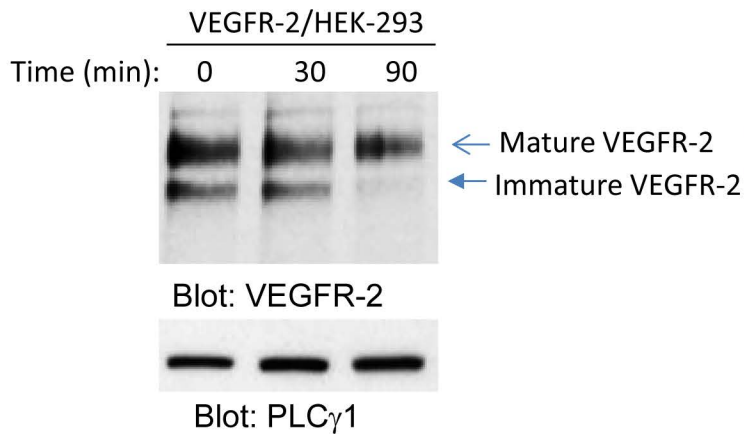

**B**

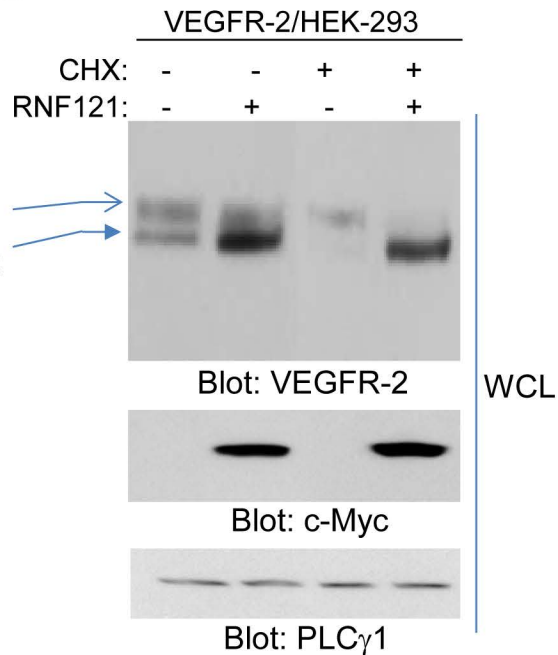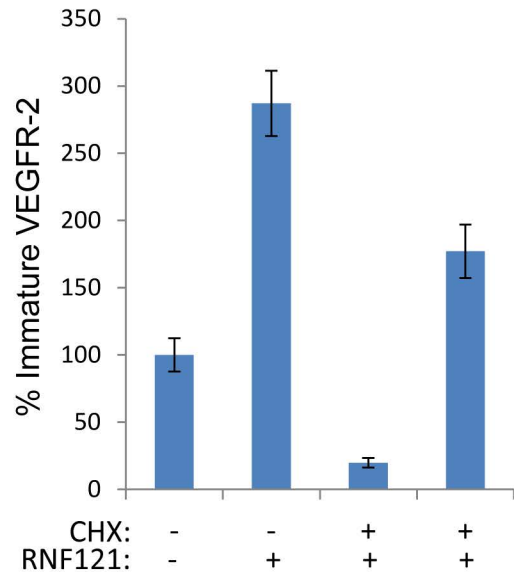

# S. Figure 3

A

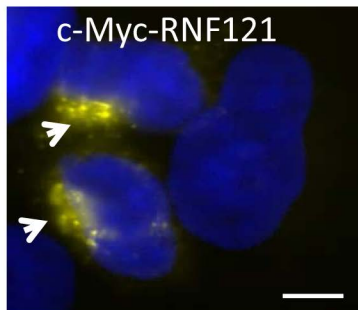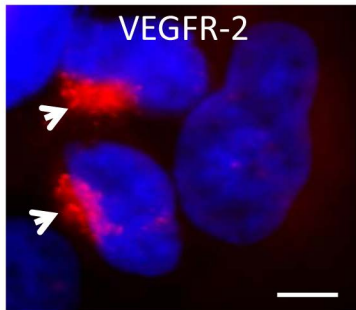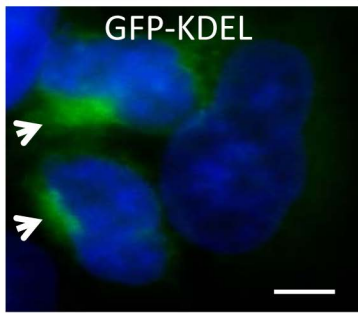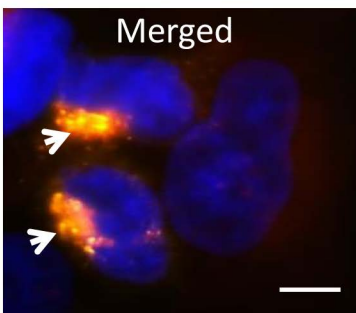

# S. Figure 4

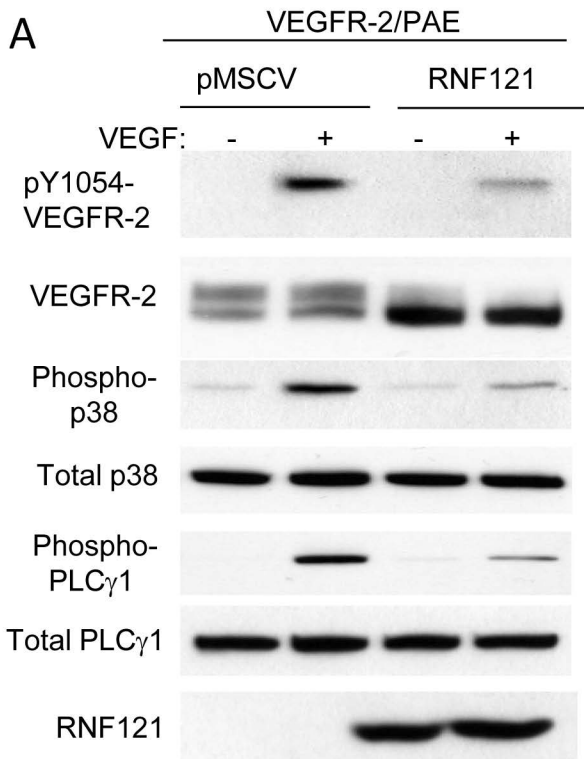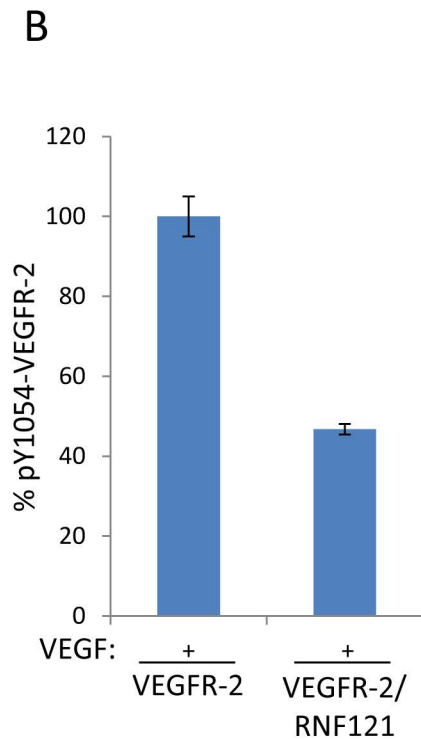

# S. Figure 5

HEK-293

---

Vector  
C-Myc RNF121

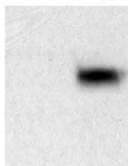

Blot: Anti-cMyc

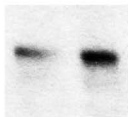

Blot: Anti-RNF121

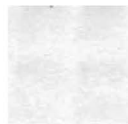

Blot: Anti-RNF121 plus blocking peptide

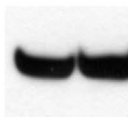

Blot: Anti-HSP70

# S. Figure 6

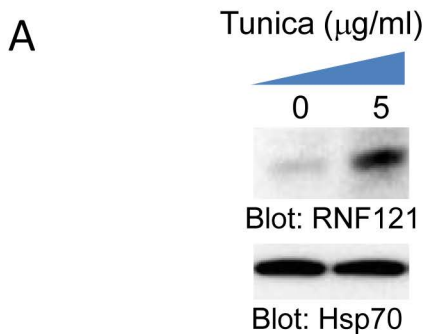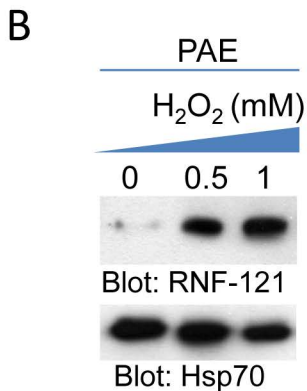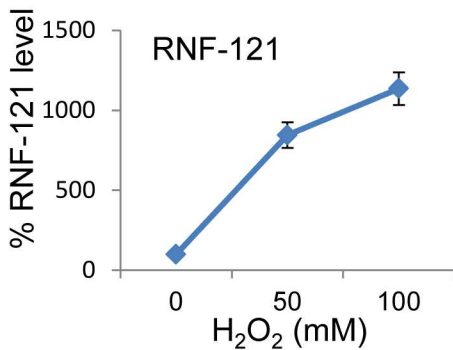

Supplement: NIHMS740793-supplement-Supp_Fig_S1-6.pdf [file NIHMS740793-supplement-Supp_Fig_S1-6.pdf]
